# Supplementary material for: Characterization of Gfat1 (zeppelin) and Gfat2, Essential Paralogous Genes Which Encode the Enzymes That Catalyze the Rate-Limiting Step in the Hexosamine Biosynthetic Pathway in Drosophila melanogaster
Source: MDPI journal article supplement (doi:10.3390/cells11030448), 2022-01-27
Supplement: s1 [file s1]

Supplementary

# Characterization of *Gfat1* (*zeppelin*) and *Gfat2*, Essential Paralogous Genes Which Encode the Enzymes That Catalyze the Rate-Limiting Step in the Hexosamine Biosynthetic Pathway in *Drosophila melanogaster*

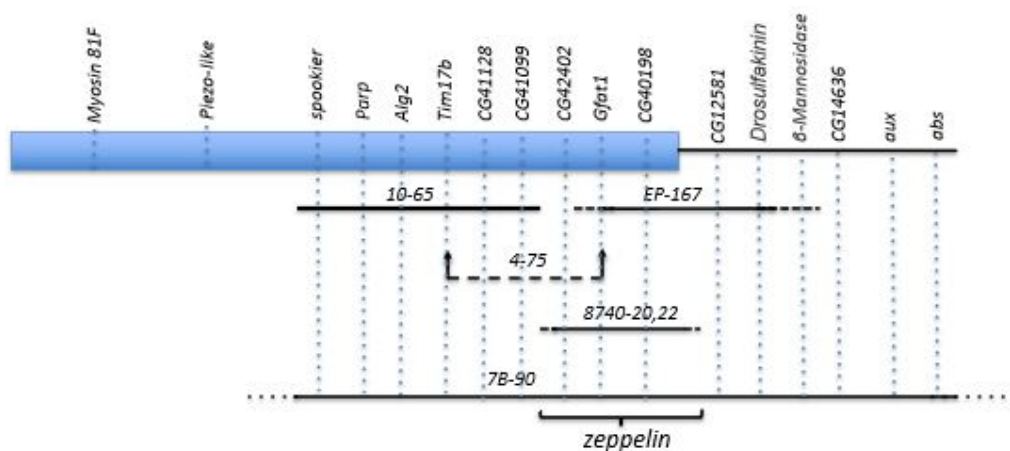

**Figure S1.** Map of proximal 3R correlating the molecular location of the *Gfat1* gene with the genetic position of *zep*. The extents of the various rearrangements used are shown below. *In(3R)4-75* is a multi-break inversion, whereas the other rearrangements are deletions in proximal 3R [35, 35, 41].

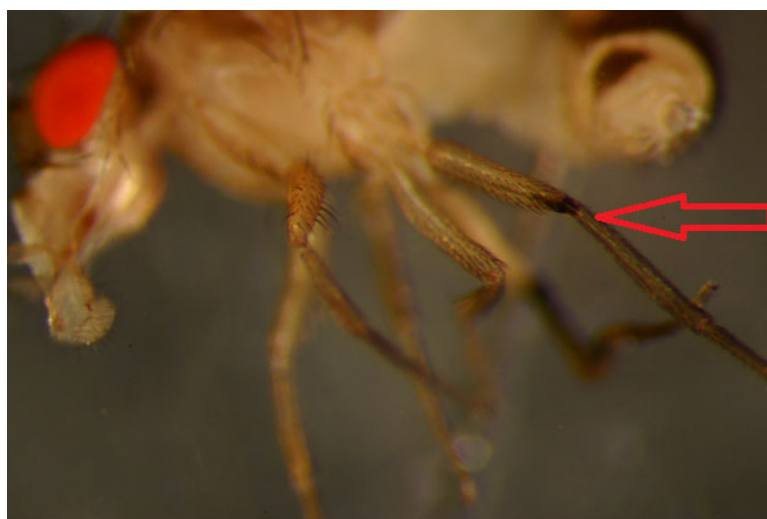

**Figure S2.** *Splayed*-like phenotype displayed by *hs-GAL4/2664-1-5M-CH2* fly raised at 29°C. Note the melanin deposit on the leg as indicated by the red arrow.

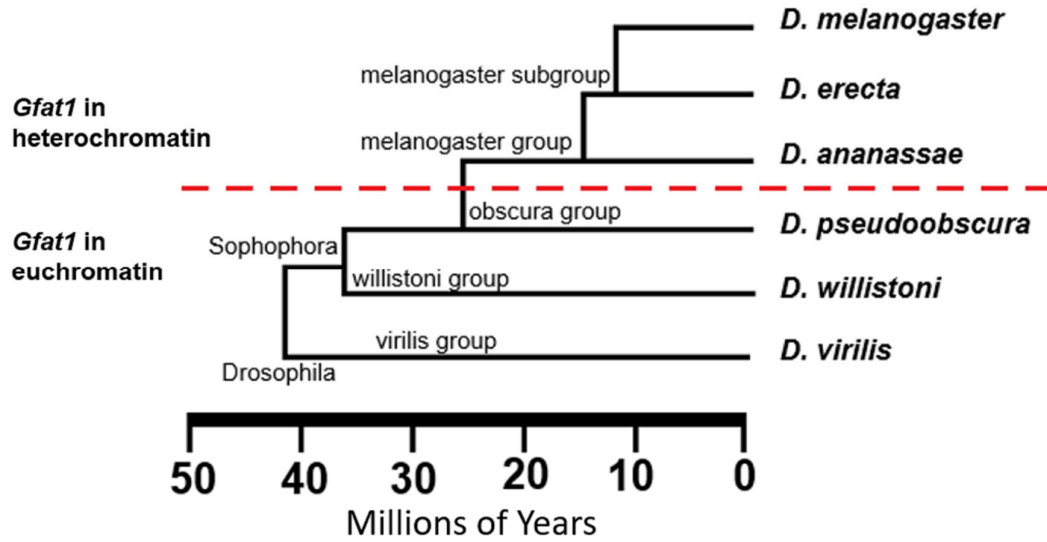

**Figure S3.** Schematic representation of *Drosophila* evolution over the last 50 million years. The dashed red line separates the species group in which the *Gfat1* gene is located in heterochromatin (*melanogaster* group) from that in which the gene is located in euchromatin (*obscura* group).

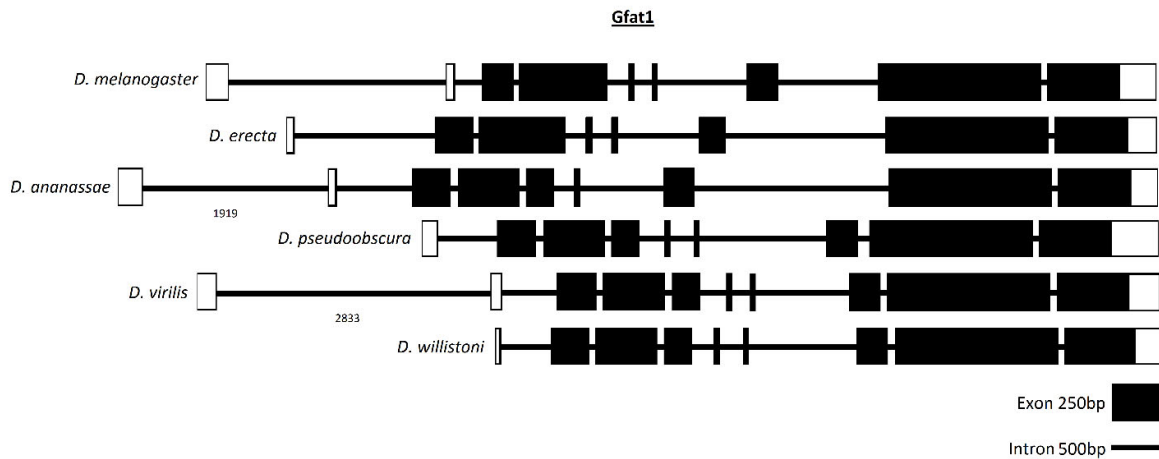

**Figure S4.** Gene architecture of the longest versions of *Gfat1* in six species of *Drosophila*. Translated exons are represented by black boxes. 5' and 3' untranslated regions (UTRs) are represented by white boxes. Introns are represented by black lines. Data from FB2017\_05 release.

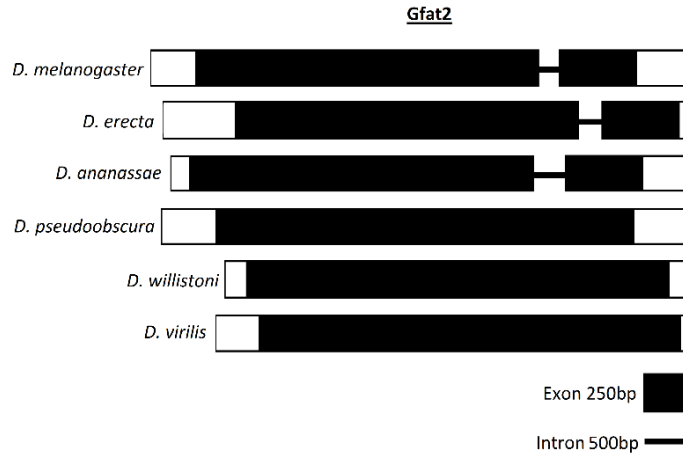

**Figure S5.** Gene architecture of *Gfat2* in six species of *Drosophila*. Translated exons are represented by black boxes. 5' and 3' UTRs are represented by white boxes. Introns are represented by black lines. Data from FB2017\_05 release.

**Table S1.** RNAi strains from *Drosophila* stock centres used in the present study.

| Stock Number and Genotype                                                     | Origin | Gene         | Designation |
|-------------------------------------------------------------------------------|--------|--------------|-------------|
| v24539: <i>w<sup>1118</sup></i> ; <i>P{GD7732}v24539</i>                      | VDRC   | <i>Gfat1</i> | v24539      |
| 42892: <i>y sc* v sev<sup>21</sup></i> ; <i>P{TRiP.HMS02585}attP40</i>        | BDSC   | <i>Gfat1</i> | B42892      |
| v105129: <i>P{KK101769}VIE-260B</i>                                           | VDRC   | <i>Gfat2</i> | V105129     |
| 34740: <i>y sc* v sev<sup>21</sup></i> ; <i>P{TRiP.HMS01220}attP2/TM3, Sb</i> | BDSC   | <i>Gfat2</i> | B34740      |
| 50909: <i>y v</i> ; <i>P{TRiP.HMJ03131}attP40</i>                             | BDSC   | <i>Ogt</i>   | B50909      |

**Table S2.** Tests for viability effects of *Gfat1* RNAi transgenes when driven ubiquitously. Chromosome 2 insertions crossed with *Act5C-GAL4/CyO*; Chromosome 3 insertions crossed with *Tub-GAL4/TM3, Sb*.

| Transgene and Location | <i>CyO</i> or <i>TM3, Sb</i><br>Progeny | RNAi with Driver |
|------------------------|-----------------------------------------|------------------|
| Chromosome 2           |                                         |                  |
| 2664-1-2M-CH2          | 100                                     | 0                |
| 2664-1-5M-CH2          | 55                                      | 0                |
| 2664-1-9M-CH2          | 42                                      | 0                |
| Chromosome 3           |                                         |                  |
| 2664-1-6M-CH3          | 58                                      | 0                |
| 2664-1-7M-CH3          | 47                                      | 0                |
| 2664-1-8M-CH3          | 40                                      | 0                |

**Table S3.** Primers used for the sequencing analysis of zep alleles. Primers span the entire coding sequence of the *Gfat1* gene (including exon/intron splice junctions). They are depicted 5' to 3' from left to right. *Gfat1* sequencing primers.

| <b>GFP-F caagagtgccatgccgaag</b>     | <b>GFP-R gacagggccatgcgaattg</b> |
|--------------------------------------|----------------------------------|
| Grp84-01 acgcttcctgctgatggac         | Grp84-02 tccagtaactggattgagt     |
| Gfat1-1F tcttggttctgtcgtgctacc       | Gfat1-1B aaccgagtttggctgctgat    |
| Gfat1-2F tcgcttcgcatttcacaag         | Gfat1-13 ccaacgtgggtcaggacgggttc |
| Gfat1-4F actacaaggttcaacattctg       | Gfat1-4B gggaaatgaattgggaggtgt   |
| Gfat1-5F ctgatggccttacgttactgt       | Gfat1-5B atgtgtccaagcaatgtgatg   |
| Gfat1-15 ctgcgcgcaatcaacatacgatt     | Gfat1-6B caagtgtaatggtaggtgc     |
| Gfat1-10F gtaagcacagcaatggtt         | Gfat1-14F gccacttgctagaaggtgga   |
| Gfat1-24R cggcaatatgataagacagtagtagc |                                  |

**Table S4.** qPCR primer sequences. Gene Amplified Primer and Probe Sequences.

| <b><i>RpL32</i></b> | <b>Forward primer 5'- GTCGGATCGATATGCTAAGCTG -3'</b><br>Reverse primer 5'- CAGATACTGTCCCTTGAAGCG -3'<br>Probe 5'-/56-FAM/ TCGATATGC /ZEN/ TAAGCTGTCGGCACAAA /3IABkFq/-3' |
|---------------------|--------------------------------------------------------------------------------------------------------------------------------------------------------------------------|
| <i>Gfat1</i>        | Forward primer 5'- ACCTATACCAACACAAGTCGC -3'<br>Reverse primer 5'- CTTCAATTCACCGGCCATG -3'<br>Probe 5'-<br>56FAM/TGCCTAGAA/ZEN/GGTGCATTGAAAGTCAAAGAG /3IABkFQ/-3'        |
| <i>Gfat2</i>        | Forward primer 5'- TTGCCAAGGAGTTGTACGAG -3'<br>Reverse primer 5'- TCCGTGTTTCAGTTCTCCAG -3'<br>Probe 5'-/56-FAM/ AGTTGAAGC /ZEN/ CCCTGCCCATAATGA /3IABkFQ/-3'             |

**Table S5.** Microsynteny of two genes flanking *RpL15* or its orthologue in six *Drosophila* species. Data from Schulze et al., 2005 and the FB2017\_05 release; note that *RpL15* is located in heterochromatin in *D. virilis*, but in euchromatin in *D. pseudoobscura* (Schulze et al., 2005); sequence identity of orthologous *RpL15* proteins versus *D.melanogaster*. *RpL15* range from 96% to 100%.

| <b>Species and Designation of <i>RpL15</i> gene</b> | <b>rad21 or Ortholog 5' to <i>RpL15</i></b> | <b>5' to 3' Orientation Relative to <i>RpL15</i></b> | <b>Dbp80 or Ortholog 3' 5' to <i>RpL15</i></b> | <b>Orientation relative to <i>RpL15</i></b> |
|-----------------------------------------------------|---------------------------------------------|------------------------------------------------------|------------------------------------------------|---------------------------------------------|
| melanogaster CG17420                                | yes                                         | same                                                 | yes                                            | same                                        |
| erecta GG163267                                     | GG13128                                     | opposite                                             | yes                                            | same                                        |
| ananassae GF20530                                   | yes                                         | opposite                                             | GF27128                                        | opposite                                    |
| pseudoobscura GA22222                               | GA31871                                     | same                                                 | yes                                            | opposite                                    |
| willistoni GK12236                                  | GK10847                                     | opposite                                             | GK10846                                        | opposite                                    |
| virilis GJ22514                                     | GJ22512                                     | opposite                                             | GJ22515                                        | same                                        |
